# Supplementary material for: Preparation, characterization, and performance of PES/GO woven mixed matrix nanocomposite forward osmosis membrane for water desalination
Source: Royal Society of Chemistry journal article supplement (doi:10.1039/d2ra03832c), 2022-01-01
Supplement: d2ra03832c1.pdf [file d2ra03832c1.pdf]

## Supplementary Information

### Preparation, characterization, and performance of PES/GO woven mixed matrix nanocomposite forward osmosis membrane for water desalination

Mervat Nasr<sup>a, b\*</sup>, Nada Alfryyan<sup>c</sup>, Sahar S. Ali<sup>d</sup>, Hanafy M. AbdEl-Salam<sup>a</sup>, Mohamed Shaban<sup>b, e</sup>

<sup>a.</sup> Chemistry Department, Faculty of Science, Beni-Suef University, Beni-Suef 62514, Egypt.

<sup>b.</sup> Nanophotonics and Applications (NPA) Lab, Physics Department, Faculty of Science, Beni-Suef University, Beni-Suef, 62514, Egypt

<sup>c.</sup> Department of Physics, College of Sciences, Princess Nourah bint Abdulrahman University, P.O. Box 84428, Riyadh 11671, Saudi Arabia

<sup>d.</sup> Chemical Engineering and Pilot-Plant Department, National Research Center, P.O. Box 12622, Dokki, Cairo, Egypt.

<sup>e.</sup> Department of Physics, Faculty of Science, Islamic University of Madinah, Al-Madinah Al-Munawarah, 42351, Saudi Arabia.

<sup>f.</sup> \*Corresponding author: [mohamed.fadel@science.bsu.edu.eg](mailto:mohamed.fadel@science.bsu.edu.eg)

Table S1. Characteristic of woven fabric used.

| Fabric properties                     | Cetin Woven |
|---------------------------------------|-------------|
| Fibre diameter ( $\mu\text{m}$ )      | 11.6        |
| Thickness ( $\mu\text{m}$ )           | 115         |
| Permeability (LMH.bar)                | 1254        |
| Tensile strength (N/Cm <sup>2</sup> ) | 31.2        |
| Elongation (%)                        | 44.2        |
| Contact angle (degree)                | 41          |
